# Supplementary material for: Global distribution of epidemic-related Shiga toxin 2 encoding phages among enteroaggregative Escherichia coli
Source: PubMed Central journal article supplement (PMC7366661; doi:10.1038/s41598-020-68462-9), 2020-07-16
Supplement: 41598_2020_68462_MOESM1_ESM.pdf [file 41598_2020_68462_MOESM1_ESM.pdf]

## Supplementary information

### Global distribution of epidemic-related Shiga toxin 2 encoding phages among enteroaggregative *Escherichia coli*

Keiko Kimata<sup>1</sup>, Kenichi Lee<sup>2</sup>, Masanori Watahiki<sup>1</sup>, Junko Isobe<sup>1</sup>, Makoto Ohnishi<sup>2</sup>, Sunao Iyoda<sup>2</sup>

<sup>1</sup>Department of Bacteriology, Toyama Institute of Health, Toyama, 9390363, Japan

<sup>2</sup>Department of Bacteriology I, National Institute of Infectious Diseases, Tokyo, 1628640, Japan

**Table S1:** Information of publicly available genomic data used in the phylogenetic analysis

**Table S2:** Comprehensive *in silico* typing of O86 isolates from Japan and EnteroBase  
(independent Excel file)

**Table S3:** Relatedness of key virulence determinants of enteroaggregative *Escherichia coli* (EAEC) in Shiga toxin-producing EAEC isolates

**Table S4:** Results of NCBI-BLAST against the Stx2a phage of JE86-ST05

**Table S1.** Information of publicly available genomic data used in the phylogenetic analysis

| Isolate ID   | Serotype/Species   | Pathotype         | Phylogenetic group | Accession no.               | Source      | Year           | Place               |
|--------------|--------------------|-------------------|--------------------|-----------------------------|-------------|----------------|---------------------|
| APEC_O1      | O1:H7              | APEC <sup>a</sup> | B2                 | CP000468                    | Poultry     | - <sup>b</sup> | USA                 |
| 12009        | O103:H2            | STEC              | B1                 | AP010958                    | Human       | 2001           | Japan               |
| 2009EL-2071  | O104:H4            | Stx-EAEC          | B1                 | CP003301                    | Human       | 2009           | Republic of Georgia |
| 2009EL-2050  | O104:H4            | Stx-EAEC          | B1                 | CP003297                    | Human       | 2009           | Republic of Georgia |
| 2011C-3493   | O104:H4            | Stx-EAEC          | B1                 | CP003289                    | Human       | 2011           | USA                 |
| 11128        | O111:H8            | STEC              | B1                 | AP010960                    | Human       | 2001           | Japan               |
| E2348/69     | O127:H6            | EPEC              | B2                 | FM180568                    | Human       | 1969           | UK                  |
| Sakai        | O157:H7            | STEC              | E                  | BA000007                    | Human       | 1996           | Japan               |
| MG1655       | O16:H48            | Commensal         | A                  | CP025268                    | -           | -              | USA                 |
| UMN026       | O17:H18            | ExPEC             | D                  | CU928163                    | Human       | 1999           | USA                 |
| I-151        | O174:H46           | STEC              | E                  | SAMN02732277                | Human       | 2005           | Germany             |
| 11368        | O26:H11            | STEC              | B1                 | AP010953                    | Human       | 2001           | Japan               |
| 042          | O44:H18            | EAEC              | D                  | FN554766                    | Human       | 1983           | Peru                |
| S88          | O45:H7             | ExPEC             | B2                 | CU928161                    | Human       | 1999           | France              |
| 536          | O6:H31             | UPEC              | B2                 | CP000247                    | Human       | 1982           | Germany             |
| IAI39        | O7:H45             | UPEC              | F                  | CU928164                    | Human       | 1980s          | France              |
| H10407       | O78:H11            | ETEC              | A                  | FN649414                    | Human       | 1973           | Bangladesh          |
| LF82         | O83:H1             | AIEC              | B2                 | CU651637                    | Human       | -              | France              |
| 290590       | O86:H27            | EAEC              | B1                 | SRR5470218                  | Human       | 2016           | UK                  |
| 300650       | O86:H27            | EAEC              | B1                 | SRR4788097                  | Human       | 2016           | UK                  |
| ERS1232417   | O86:H32            | -                 | E                  | ERR1789882                  | -           | -              | -                   |
| AMR520-5149  | O86:H32            | STEC              | A                  | SRR8079366                  | Livestock   | 2014           | Canada              |
| AZ-TG60412   | O86:H51            | -                 | B1                 | SRR1186338                  | Poultry     | 2013           | USA                 |
| C00009219    | O86:H51            | -                 | A                  | ERR296688                   | -           | -              | -                   |
| C309         | O86:H32            | STEC              | A                  | SRR5927204                  | Wild Animal | 2014           | USA                 |
| CFS3323      | O86:H27            | -                 | B1                 | ERR3333544                  | Livestock   | 2004           | Germany             |
| DRS013916    | O86:H27            | EAEC              | B1                 | DRR015808                   | -           | -              | Japan               |
| ECO0117      | O86:H51            | -                 | B1                 | ERR439680                   | Human       | 2009           | UK                  |
| EH3148       | O86:H27            | Stx-EAEC          | B1                 | Uploaded Reads <sup>c</sup> | -           | 2018           | Belgium             |
| FSIS11815123 | O86:H32            | -                 | A                  | SRR8137335                  | Livestock   | 2018           | USA                 |
| FSIS11919008 | O86:H51            | -                 | B1                 | SRR8754961                  | Livestock   | 2019           | USA                 |
| KS14_4E      | O86:H51            | -                 | B1                 | DRR103021                   | Livestock   | 2013           | Japan               |
| MOD1-EC6197  | O86:H27            | -                 | B1                 | SRR3465496                  | Wild Animal | 2013           | USA                 |
| PSU-0601     | O86:H51            | -                 | B1                 | SRR7042103                  | Wild Animal | 1999           | USA                 |
| PSU-0715     | O86:H51            | -                 | B1                 | SRR7429964                  | Livestock   | 2012           | USA                 |
| TM63         | O86:H51            | -                 | E                  | DRR138475                   | Human       | 2018           | Thailand            |
| DTU2016_763  | O86:H27            | -                 | E                  | Uploaded Reads              | Poultry     | 2015           | Denmark             |
| DTU2017-803  | O86:H27            | -                 | E                  | ERR2091428                  | Poultry     | 2016           | Denmark             |
| DTU2017-855  | O86:H51            | -                 | E                  | ERR2091353                  | Poultry     | 2016           | Denmark             |
| ESBL-15/0220 | O86:H51            | -                 | B1                 | ERR2019096                  | Livestock   | 2015           | Austria             |
| 2012EL-1823B | <i>E. albertii</i> | -                 | -                  | CP030783                    | Human       | 2012           | USA                 |

<sup>a</sup>APEC, avian pathogenic *E. coli*; STEC, Shiga toxin-producing *E. coli*; Stx-EAEC, Shiga toxin-producing enteroaggregative *E. coli*; EPEC, enteropathogenic *E. coli*; ExPEC, extraintestinal pathogenic *E. coli*; EAEC, enteroaggregative *E. coli*; UPEC, uropathogenic *E. coli*; ETEC, enterotoxigenic *E. coli*; AIEC, adherent invasive *E. coli*.

<sup>b</sup>-, not available.

<sup>c</sup>Uploaded directly to EnteroBase.

**Table S3.** Relatedness of key virulence determinants of enteroaggregative *Escherichia coli* (EAEC) in Shiga toxin-producing EAEC isolates

| Function                  | Gene        | Encoding replicons | O86:H27          |           |        |        |           |        | O104:H4    | O111:H21        |                 |
|---------------------------|-------------|--------------------|------------------|-----------|--------|--------|-----------|--------|------------|-----------------|-----------------|
|                           |             |                    | JE86-ST02        | JE86-ST05 | 290590 | 300650 | DRS013916 | EH3148 | 2011C-3493 | 226             |                 |
| <i>agg</i> regulator      | <i>aggR</i> | pAA                | ref <sup>a</sup> | 100       | 100    | 100    | 100       | 100    | 100        | 96.2            | 96.2            |
| AAF/III                   | <i>aggA</i> | pAA                | ref              | 100       | 100    | 100    | 100       | 100    | 100        | ND <sup>b</sup> | ND <sup>b</sup> |
|                           | <i>aggB</i> |                    | ref              | 100       | 100    | 100    | 100       | 100    | 99.6       | ND              | ND              |
|                           | <i>aggC</i> |                    | ref              | 100       | ND     | 96.3   | 100       | 100    | 99.8       | ND              | ND              |
|                           | <i>aggD</i> |                    | ref              | 100       | 100    | 100    | 100       | 100    | 100        | ND              | ND              |
| dispersin and transporter | <i>aap</i>  | pAA                | ref              | 100       | 100    | 100    | 100       | 100    | 100        | 96.3            | 96.3            |
|                           | <i>aatP</i> |                    | ref              | 100       | 100    | 100    | 100       | 100    | 99.9       | 95.0            | 95.0            |
|                           | <i>aatA</i> |                    | ref              | 100       | 100    | 100    | 100       | 100    | 100        | 95.3            | 95.5            |
|                           | <i>aatB</i> |                    | ref              | 100       | 100    | 100    | 100       | 100    | 100        | 96.2            | 96.1            |
|                           | <i>aatC</i> |                    | ref              | 100       | 99.9   | 100    | 100       | 100    | 100        | 96.2            | 96.2            |
|                           | <i>aatD</i> |                    | ref              | 100       | 100    | 100    | 100       | 100    | 100        | 92.9            | 92.8            |
| T6SS                      | <i>aaiA</i> | Chromosome         | ref              | 100       | 100    | 100    | 100       | 100    | 100        | 100             | 100             |
|                           | <i>aaiB</i> |                    | ref              | 100       | 100    | 100    | 100       | 100    | 100        | 99.9            | 99.9            |
|                           | <i>aaiC</i> |                    | ref              | 100       | 100    | 100    | 100       | 100    | 100        | 99.8            | 99.6            |
|                           | <i>aaiD</i> |                    | ref              | 100       | 100    | 100    | 100       | 100    | 100        | 100             | 100             |
|                           | <i>aaiE</i> |                    | ref              | 99.9      | 99.9   | 100    | 100       | 100    | 100        | 99.9            | 99.9            |
|                           | <i>aaiF</i> |                    | ref              | 100       | 100    | 100    | 100       | 100    | 100        | 99.9            | 100             |
|                           | <i>aaiG</i> |                    | ref              | 100       | 100    | 100    | 100       | 100    | 100        | 100             | 99.9            |
|                           | <i>aaiH</i> |                    | ref              | 100       | 100    | 100    | 100       | 100    | 100        | 100             | 100             |
|                           | <i>aaiI</i> |                    | ref              | 100       | 100    | 100    | 100       | 100    | 100        | 100             | 100             |
|                           | <i>aaiJ</i> |                    | ref              | 100       | 100    | 100    | 100       | 100    | 100        | 100             | 100             |
|                           | <i>aaiK</i> |                    | ref              | 100       | 100    | 100    | 100       | 100    | 100        | 99.8            | 100             |
|                           | <i>aaiL</i> |                    | ref              | 100       | 100    | 100    | 100       | 100    | 100        | 99.9            | 99.9            |
|                           | <i>aaiM</i> |                    | ref              | 100       | 100    | 100    | 100       | 100    | 100        | 99.8            | 99.7            |
|                           | <i>aaiN</i> |                    | ref              | 100       | 100    | 100    | 100       | 100    | 100        | 99.9            | 99.9            |
| <i>aaiO</i>               | ref         | 100                | 100              | 100       | 100    | 100    | 99.9      | 99.9   | 99.9       |                 |                 |
| SPATEs                    | <i>pet</i>  | Plasmid            | ND               | ND        | ND     | ND     | ND        | ND     | ND         | ND              | ND              |
|                           | <i>pic</i>  | Chromosome         | ref              | 100       | 100    | 100    | 100       | 100    | 100        | 99.9            | 99.9            |
|                           | <i>sat</i>  | Chromosome         | ref              | 100       | 100    | 100    | 100       | 100    | ND         | 99.9            | 99.9            |
|                           | <i>sigA</i> | Chromosome         | ND               | ref       | ND     | ND     | ND        | ND     | 98.0       | ND              | ND              |
|                           | <i>sepA</i> | pAA                | ref              | 100       | 100    | 100    | 100       | 100    | 100        | 99.6            | ND              |
| Biofilm                   | <i>fis</i>  | Chromosome         | ref              | 100       | 100    | 100    | 100       | 100    | 100        | 100             | 100             |
|                           | <i>shf</i>  | pAA                | ref              | 100       | 100    | 100    | 100       | 100    | 100        | 98.5            | ND              |
|                           | <i>yafK</i> | Chromosome         | ref              | 100       | 100    | 100    | 100       | 100    | 100        | 99.5            | 99.5            |

<sup>a</sup>Similarity compared to JE86-ST02 or JE86-ST05: ref, reference; number, similarity %; ND, not detected under the criteria of > 90% length and > 60% identity.

<sup>b</sup>*agg* operon of AAF/III was absent but the *agg* operon of the following subtypes is present: O104:H4, AAF/I; O111:H2, AAF/V.

**Table S4.** Results of NCBI-BLAST against the Stx2a phage of JE86-ST05

| Entry ID <sup>a</sup> | Host serotype | Isolation Year | Isolation country | Epidemiological information | Accession no. | Alignment length (bp) | No. mismatch     | No. gaps |
|-----------------------|---------------|----------------|-------------------|-----------------------------|---------------|-----------------------|------------------|----------|
| FWSEC0009             | O104:H4       | 2011           | Germany           | Clinical sample             | CP031902      | 60,895                | 2 <sup>bc</sup>  | 0        |
| LB226692              | O104:H4       | 2011           | Germany           | HUS patient                 | CP024992      | 60,895                | 2 <sup>bc</sup>  | 0        |
| FDAARGOS_403          | O104:H4       | Not available  | USA               | Clinical sample             | CP023535      | 60,895                | 2 <sup>bc</sup>  | 0        |
| 2011C-3493            | O104:H4       | 2011           | USA               | 2011 European outbreak      | CP003289      | 60,895                | 2 <sup>bc</sup>  | 0        |
| HUSEC2011             | O104:H4       | 2011           | Germany           | 2011 European outbreak      | HF572917      | 60,895                | 3 <sup>bcd</sup> | 0        |
| phiON-2011            | O104:H4       | 2011           | Canada            | 2011 European outbreak      | KU298437      | 60,891                | 2 <sup>bc</sup>  | 0        |
| P13363                | O104:H4       | 2011           | Germany           | 2011 European outbreak      | HG803182      | 60,891                | 2 <sup>bc</sup>  | 0        |
| FDAARGOS_349          | O104:H4       | 2011           | Germany           | Human stool                 | CP027394      | 60,895                | 4 <sup>bcd</sup> | 0        |
| P13374                | O104:H4       | 2011           | Germany           | 2011 European outbreak      | HE664024      | 60,892                | 4 <sup>bcd</sup> | 4        |

<sup>a</sup>Entries that aligned with the full length (> 99%) of the Stx2a phage of JE86-ST05 were shown.

<sup>b</sup>Non-synonymous mutation (V50I) in antirepressor gene.

<sup>c</sup>Non-synonymous mutation (T1674A) in hypothetical gene.

<sup>d</sup>Intergenic region.

<sup>e</sup>Non-synonymous mutation (V136A) in hypothetical gene.

<sup>f</sup>Synonymous mutation in rzdD gene and hypothetical gene.
